1 ***Dlc1* controls cardio-vascular development downstream of Vegfa/Kdrl/Nrp1 signaling**  
2 **in the zebrafish embryo.**

3

4 Tanja Linnerz<sup>1</sup> and Julien Y. Bertrand<sup>1, 2</sup>.

5

6 <sup>1</sup> University of Geneva, Faculty of Medicine, Department of Pathology and Immunology, Rue  
7 Michel-Servet 1, 1211 Geneva 4, Switzerland.

8 <sup>2</sup> corresponding author: Julien.bertrand@unige.ch

9

10 *short title: dlc1 controls cardiovascular development*

11

12

13 Original article

14 abstract: 152 words

15 5615 words (excluding any figure legends), 6 figures, 5 supplemental figures, 2 supplemental  
16 tables, 5 supplemental movies.

17 44 references

18

19

20

21

22

23

24

25

## 1 **ABSTRACT**

2 The family of *deleted-in-liver-cancer* (*dlc*) genes encodes RhoGTPases and plays pivotal roles  
3 in cardiovascular development, but animal models for studying their functions are sparse due  
4 to early embryonic lethality. Gain and loss of function of *dlc1* and *dlc3* severely altered the  
5 growth of intersegmental vessels in the trunk of zebrafish embryos. Additionally,  
6 overexpression of *dlc1* affected the growth of the common cardinal veins, but could rescue the  
7 arrest of angiogenesis induced by *Vegfr2* inhibition, placing *dlc1* downstream of *kdrl* signaling.  
8 Loss of *dlc1* negatively affected the lumenization of the first aortic arch arteries and the lateral  
9 dorsal aortae. *dlc1* mutants displayed a full obstruction in the early outflow tract during cardiac  
10 morphogenesis, which models to alterations in DLC1 detected in congenital heart defects in  
11 human patients. This study provides a functional *in vivo* characterization of *dlc1* and *dlc3* during  
12 vertebrate embryogenesis and places *dlc1* as a key gene to control vascular development.

13

## 14 **INTRODUCTION**

15 The cardiovascular system is one of the earliest systems formed during embryonic  
16 development. Its proper formation requires a multitude of orchestrated processes, including cell  
17 proliferation, cell fate determination and migration. Many diseases develop through  
18 perturbation of these key physiological processes leading to systemic consequences.  
19 Disruptions in organ formation during embryonic development can result in congenital  
20 conditions. A well-known example is congenital heart defects (CHD), which can lead to  
21 disability or severely impaired organ function and death. Thus, studying the genetic of  
22 embryonic development is necessary to understand the mechanisms underlying these  
23 pathological conditions, thereby facilitating the development of prenatal screening tests and  
24 treatments.

1 The zebrafish model is suitable for studying many pathological conditions due to their  
2 conserved biology, availability of transgenic lines and optical transparency. Moreover, many  
3 genes that are embryonic lethal in mammals can be studied during early development in  
4 zebrafish larvae. One such gene, *deleted in liver cancer 1 (dlc1)*, has been shown to be a *bona*  
5 *fide* tumor suppressor gene and is frequently downregulated or lost in many human cancers<sup>1-3</sup>.  
6 The three DLC proteins, DLC1, DLC2 and DLC3, belong to the family of RhoGAP proteins  
7 and preferentially target RHOA<sup>1</sup> and to a lesser degree, CDC42<sup>1,4</sup>. There is a high degree of  
8 similarity between all three family members, each possessing an N-terminal sterile alpha motif  
9 (SAM), an enzymatically active GAP domain and a C-terminal steriodogenic acute regulatory  
10 protein (StAR)-related lipid transfer (START) domain<sup>5</sup>. The function of DLC1 as a tumor  
11 suppressor is associated with its RhoGAP activity, leading to the inactivation of RHOA after  
12 concomitant binding to tensins<sup>4</sup>, which subsequently affects the formation of stress fibers and  
13 focal adhesions<sup>6</sup>. Cytoskeletal rearrangements are key requirements in directing endothelial  
14 cell migration during blood vessel growth. Vasculogenesis and angiogenesis are thereby tightly  
15 regulated processes that depend on the interplay between numerous signaling pathways.  
16 Besides the well-known major VEGF/VEGFR signaling pathway<sup>7</sup>, other guidance factors, such  
17 as Semaphorins, Plexins and Neuropilins, also play a crucial role in vascular development and  
18 can additionally function as enhancing co-factors in the VEGF/VEGFR signaling axis<sup>7,8</sup>.  
19 However, not much is known about the role of *dlc1* during organogenesis because its  
20 homozygous deletion is embryonic lethal in *Drosophila*, mouse and avian models<sup>9-14</sup>. *Dlc1*<sup>null</sup>  
21 mouse embryos showed multiple anatomical changes in the developing vasculature and heart,  
22 which were analyzed postmortem due to intrauterine lethality<sup>9</sup>. A recent study also linked the  
23 occurrence of a rare variant of DLC1 to human CHDs<sup>15</sup>. To further study the role of these genes  
24 in development, a *Dlc2*-KO mouse model has been established but no phenotype was  
25 detected<sup>16</sup>, whereas there is no current animal model for *Dlc3*<sup>16</sup>.

1 In this study, we performed the first *in vivo* characterization of the functional role of *dlc1* and  
2 *dlc3* (*stard8*) during embryonic and larval development using the advantages of the zebrafish  
3 model. We initially show that both genes are highly expressed in the vascular lineage. Gain and  
4 loss-of-function experiments resulted in abnormal development of the vascular network,  
5 suggesting an important role for *dlc1* and *dlc3* in orchestrating endothelial cell migration during  
6 angiogenic sprouting *in vivo*. We show that *dlc1* acts directly downstream of the *kdrl* signaling  
7 axis *in vivo*, which was further confirmed by observing a loss in the integrity of the endothelial  
8 cell sheet and an uneven leading edge during common cardinal vein growth, a phenotype  
9 reminiscent of dampened Sema3/PlxnD1 signaling and RhoA inactivation<sup>17</sup>. Finally, we used  
10 CRISPR/Cas9-mediated genome editing to establish *dlc1* and *dlc3* mutants. *dlc1*<sup>null</sup> embryos  
11 showed defects in the lumenization of the first aortic arch arteries, in the formation of the lateral  
12 dorsal aortae and the development of the immature outflow tract in the embryonic heart. These  
13 observations are concordant with a study that recently linked DLC1 mutations to human CHDs,  
14 therefore reinforcing our zebrafish *dlc1* mutant as an *in vivo* model to study the etiology of  
15 human CHDs.

16

## 17 **RESULTS**

### 18 ***dlc1* and *dlc3* are expressed in the lateral plate mesoderm (LPM) and in endothelial cells**

19 Currently, only mouse and chicken models have been established to analyze early *dlc*  
20 expression and function during embryonic development<sup>9,10</sup>. To investigate the spatial and  
21 temporal distribution of *dlc1*, *dlc2* (*stard13b*) and *dlc3* during zebrafish development, we  
22 performed *in situ* hybridization at different embryonic stages. Specific expression of all three  
23 genes was detected from 6 somites (ss) onwards. *dlc1* expression was first detected in the  
24 posterior LPM (PLPM) and in the head of the embryo (Fig. 1A, Supplemental Fig. 1A). At 24  
25 hours post fertilization (hpf), *dlc1* expression was broadly distributed throughout embryonic

1 tissues and in the vascular system. This included the mid cerebral vein (MCeV) in the head  
2 (Fig. 1B, arrowhead) and the aortic and venous endothelium in the trunk (Fig. 1B, C). *dlc3* was  
3 expressed in the anterior LPM and the PLPM (Fig. 1D solid arrows, Supplemental Fig. 1B),  
4 intersomitic regions, and the tail bud at 6 ss (Fig. 1D, Supplemental Fig. 1C). At 24 hpf, *dlc3*  
5 expression strongly resembled *kdr1* expression, marking the axial trunk vasculature and the first  
6 sprouting intersegmental vessels (ISVs) (Fig. 1E). Due to the absence of *dlc2* expression in the  
7 LPM and vascular tissues (Supplemental Fig. 1D-G), the physiological role of *dlc2* was not  
8 further investigated. The endothelial expression of *dlc1* and *dlc3* was confirmed in sorted  
9 *kdr1:eGFP<sup>+</sup>* cells by qPCR analysis. Both genes were enriched in endothelial cells (ECs) at 26  
10 hpf compared to eGFP-negative sorted cells (Fig. 1F, G). Altogether, *dlc1* and *dlc3*, but not  
11 *dlc2*, are expressed in putative angioblasts in the LPM and in ECs at later stages of development.

12

### 13 ***Overexpression of dlc1 and dlc3 affects angiogenesis***

14 Overexpression of *dlc1* and *dlc3* (by injection of full-length mRNA at the 1-cell stage) induced  
15 a high lethality by 8 hpf ranging from 75% to 95% of injected embryos. The surviving embryos  
16 showed severe ISV defects, which manifested in hyperbranching and misguided vessels (Fig.  
17 2A-C). To overcome this problem, we established a stable transgenic line, *hsp70:dlc1*, with  
18 *dlc1* under the control of the heat-shock promoter *hsp70* (Fig. 2D and Supplemental Fig. 2).  
19 Analysis of ISVs at 2 days post fertilization (dpf) following heat shock at 13ss revealed  
20 prominent patterning defects. Thus, temporal restriction of *dlc1* overexpression (Supplemental  
21 Fig. 2) recapitulated the phenotype observed in mRNA overexpression experiments (Fig. 2D-  
22 H), while greatly reducing lethality. Besides the ISV phenotype, heat-shocked embryos also  
23 displayed alterations in the growth of the bilateral common cardinal veins (CCVs). The CCV  
24 migrates as a collective EC sheet that ultimately connects the venous system and the  
25 endocardium of the cardiac inflow tract (IFT). In heat-shocked embryos, the leading front and

1 edges of the migrating CCV cell sheet often appeared uneven and/or small holes were observed  
2 in the EC sheet (Fig. 2I, J). These two CCV phenotypes appear to be dependent on the RhoGAP  
3 domain of *dlc1*, as truncated *dlc1* mRNAs containing only the GAP and START domains  
4 caused a similar phenotype (Fig. 2K, K'), while other truncated constructs of *dlc1* did not induce  
5 this phenotype (Supplemental Table 1). When we treated heat-shocked embryos with a Rho  
6 Activator, we partially restored the growth of the CCVs (Fig. 2L-O), demonstrating that *dlc1*  
7 alters the CCV growth pattern in a GAP-dependent manner.

8

### 9 *dlc1* affects CCV growth via the *Sema3d/PlxnD1* and the *Nrp1/RhoA* axes

10 The CCV growth pattern induced by *dlc1* overexpression (Fig. 3A) is similar to the phenotype  
11 observed in *sema3d* morphants and mutants<sup>17</sup>. A recent zebrafish study showed that *Sema3d*  
12 regulates collective EC migration in the CCVs by two distinct mechanisms. The guidance and  
13 straight outgrowth of the CCV is dependent on *Sema3d* signaling through *PlexinD1*, whereas  
14 the cytoskeletal integrity of the EC sheet is maintained by *Sema3d* signaling through *Nrp1*. The  
15 latter regulates actin network organization through *RhoA*, which stabilizes the EC sheet  
16 morphology<sup>17</sup>. To investigate whether *Dlc1* mediates its effect on CCV development via  
17 *Sema3d* and *Nrp1*, zebrafish *sema3d* and rat *Nrp1* mRNA<sup>17</sup> were injected in one-cell stage  
18 *hsp70:dlc1* embryos, that were then heat-shocked at 13ss. While *sema3d* mRNA rescued the  
19 uneven growing edge of the CCV, holes in the migrating EC sheet were still present (Fig. 3B,  
20 C, F). Conversely, *Nrp1* overexpression rescued the EC sheet integrity but not the uneven CCV  
21 growth pattern (Fig. 3D, E, G). These results suggest that *Dlc1* controls EC migration via the  
22 *Sema3d/PlxnD1* and EC sheet integrity via the *Nrp1/RhoA* axis during CCV growth.

23

24

25

1 ***dlc1 acts downstream of kdrl signaling***

2 Neuropilins function as co-receptors to enhance the binding activity of Vegfa and Vegfc to Flt1,  
3 Kdrl and Flt4, respectively<sup>7,8</sup>. Since we showed that Dlc1 interacts with the Sema3d/PlxnD1  
4 and the Nrp1/RhoA axes, we next examined its role in Kdrl signaling. To investigate this,  
5 *hsp70:dlc1* embryos were divided into two groups and only one group was heat-shocked at 13ss  
6 prior to treatment with a high dose (1.5 $\mu$ M) of the VEGFR2 inhibitor SU5416 for 5 hours (Fig.  
7 3H). At 3dpf, the non-heat-shocked SU5416-treated embryos showed pronounced vascular  
8 defects throughout the whole embryo (Fig. 3I). All vasculogenic and angiogenic sites were  
9 affected, which led to a complete absence of blood circulation. In 20% of these embryos, ISVs  
10 were able to partially regrow, however, the large majority failed to extend beyond the horizontal  
11 myoseptum (Fig. 3I, asterisks). In sharp contrast, temporal-controlled overexpression of *dlc1*  
12 restored ISV growth in 83% of examined embryos (Fig. 3J, K). Overexpression of *Dlc1* not  
13 only rescued the initial sprouting defect, but also prevented the ISV extension defects that were  
14 observed in control SU5416-treated embryos. In line with our initial gain-of-function  
15 phenotype, we still observed some additional hyper-sprouting (Fig. 3J, arrowheads). This  
16 finding suggests that Dlc1 acts downstream of the Kdrl signaling axis and plays a crucial role  
17 during vascular development.

18

19 ***dlc1 activity is modulated by phosphorylation***

20 In human epithelial cells, DLC1 activity is regulated by a phosphorylation-dephosphorylation  
21 cycle downstream of EGFR signaling<sup>18</sup>. Therefore, we investigated whether inhibiting protein  
22 phosphatase 2 A (PP2A) dephosphorylation of Dlc1 could suppress its activity *in vivo* (Fig.  
23 3L). Treatment with okadaic acid (OA), a PP2A inhibitor, caused only minimal effects on  
24 vascular development (Fig. 3M). *Hsp70:dlc1* embryos were heat-shocked at 13ss and  
25 subsequently treated with OA overnight. OA treatment rescued the hyper-sprouting ISV

1 phenotype induced by *dlc1* gain-of-function (Fig. 3N-P), suggesting a conserved regulation of  
2 *dlc1* in zebrafish *in vivo*, compared to what was previously observed *in vitro* for human cells.

3

#### 4 ***The dlc1 mutation impairs the development of the vascular system***

5 By using CRISPR/Cas9, we generated two different *dlc1* mutant alleles: a -3/+2 bp indel  
6 mutation and a -4 bp deletion (Supplemental Fig. 3A). Both mutations resulted in premature  
7 stop codons after 174 and 173 translated amino acids, respectively; resulting in severely  
8 truncated proteins that lacked most of the FAT domain, and the GAP and START domains.  
9 Based on our knowledge of the Dlc family of proteins, we considered these as null alleles. The  
10 mutant phenotypes were analyzed on a *kdrl:eGFP* transgenic background from 24hpf until  
11 2.5dpf. Matings of *dlc1*<sup>+/-</sup> adults always induced the same two phenotypes in mutant embryos  
12 with a Mendelian ratio (20-25%). However, the distribution of these two phenotypes varied  
13 considerably and was independent of the mating pairs. The less severe phenotype consisted of  
14 the impaired formation of the lateral dorsal aortae (LDAs) and aortic arches 1 (AA1s) (12%-  
15 25% of mutant embryos per clutch), which in most cases did not result in embryonic lethality  
16 (Fig. 4). In some cases, the AA1s were functionally impaired, resulting either in stenosis (Fig.  
17 4A, B arrow) or failure to connect to the LDA (Fig. 4B right side, arrowhead). In most cases,  
18 the bilateral LDA either failed to correctly merge into one vessel (Fig. 4E, F, F') or failed to  
19 complete proper lumenization (Fig. 4G, G'). This was phenocopied by *dlc1*-MO injection  
20 (Supplemental Fig. 3C,D; Fig. 4H, I, I'). Erythrocytes could often only circulate through one  
21 LDA, possibly compensating for the stenosis in the other LDA (Fig. 4I arrows). *Dlc1* mutant  
22 embryos showed stenotic phenotypes throughout the LDA, including the looped lateral region,  
23 where the LDA merge into the AA1 (Fig. 4C, D). Surprisingly, *dlc3* mutants (Supplemental  
24 Fig. 3B) showed only transient mild edema and decelerated blood flow, especially in the head,  
25 but these phenotypes resolved completely by 2.5dpf (data not shown). Overall, there were no



1 specific changes to the vasculature in *dlc3* mutants that could explain this transient phenotype.  
2 Only in rare cases did *dlc3* mutant embryos display a comparable LDA phenotype to *dlc1*  
3 mutants (Supplemental Fig. 4A, B). Surprisingly, the *dlc1* or *dlc3* mutants did not show any  
4 modified ISV growth, whereas both MOs considerably affected ISV growth in the trunk  
5 (Supplemental Fig. 3C-E, Supplemental Fig. 5). *In vivo* time-lapse microscopy of *dlc1* and *dlc3*  
6 morphants showed growing ISV stalling at the horizontal myoseptum, as they failed to properly  
7 elongate dorsally (Supplemental Fig. 5A-F and Supplemental Movies 1-3). To determine if the  
8 *dlc1* morphants showed an alteration in tip and/or stalk cell identity, we purified ECs from their  
9 trunks and tails (Supplemental Fig. 5G). There were no changes in the expression of genes  
10 involved in tip or stalk cell identity between *dlc1* morphants and control embryos  
11 (Supplemental Fig. 5H). This indicated that *dlc1* likely controls the directed EC migration of  
12 sprouting ISVs but does not affect the identity of tip and stalk cells in the angiogenic sprout.  
13 Taken together this data suggests that *dlc1* controls vasculogenesis in the LDA and AA1s and  
14 EC migration during angiogenic sprouting in zebrafish.

15

### 16 ***dlc1* mutant embryos as a model of congenital heart defects (CHDs)**

17 A second phenotype was found in 0%-13% of embryos obtained from *dlc1*<sup>+/-</sup> incrosses, which  
18 did not survive past 5dpf (Fig. 5). This severe phenotype was observed as early as 28-30 hpf  
19 due to the lack of blood circulation and the development of pericardial edemas (Fig. 5A, B).  
20 Microangiographies confirmed that no blood or liquid could leave the heart and enter  
21 circulation in these mutants (Fig. 5C, D). The absence of blood circulation was mainly due to  
22 a defective immature outflow tract (OFT; 80%), resulting in backflow of blood from the  
23 ventricle to the atrium (Fig. 5B, Supplemental Movies 4 and 5), preventing blood from leaving  
24 the heart. Furthermore, the defective OFT formation resulted in enlargement and dilation of the  
25 heart but did not affect atrium and ventricle specification (Fig. 5E, F). qPCR analysis on pools

1 of isolated mutant hearts revealed significantly higher expression of *plxnd1* and a trend towards  
2 elevated *kdrl* expression (not significant) compared to control hearts, whereas expression of the  
3 cardiomyocyte marker *myl7* was similar (Fig. 5G). Due to the cardiac enlargement, the  
4 observed transcriptional changes could either be attributed to more endocardial cells or to an  
5 overall higher expression of *plxnd1* and *kdrl*. Moreover, mutant hearts displayed a change in  
6 *bmp4* expression that normally marks the OFT, the atrio-ventricular (AV) canal, and to a much  
7 lesser extent, the IFT (Fig. 5H, M). In *dlc1* mutants, *bmp4* staining was highly present in the  
8 OFT and the IFT, but only remotely in the AV canal (Fig. 5I, M), even though no changes in  
9 overall *bmp4* expression could be detected by qPCR (Fig. 5J). This rather suggests a change in  
10 *bmp4* distribution within the heart than a change at the transcriptional level (Fig. 5M). *dlc1*  
11 morphants phenocopied the abnormal *bmp4* distribution in the heart (Fig. 5K, L), but not the  
12 obstructed OFT phenotype. This indicates that the changes in *bmp4* distribution are probably  
13 not a result of the morphological alterations of the heart due to the lack of blood flow, but rather  
14 depended on the proper migration of *bmp4*-expressing cells within the heart of *dlc1* mutants.  
15 Decreased *dlc3* levels did not cause any cardiac phenotypes, but *dlc1/dlc3* double mutants  
16 exhibited higher occurrence of the cardiac phenotype. Concordant with this hypothesis, double  
17 mutant fish never survived to adulthood. Moreover, injection of low doses of the *dlc3*-MO (4  
18 ng) into *dlc1* mutants favored the appearance of the severe cardiac phenotype by 2-fold (Fig.  
19 5N). These results point towards a certain degree of redundancy between *dlc1* and *dlc3* during  
20 cardiovascular development, although *dlc1* seems to be the major player in this process. Overall  
21 this suggests that *dlc1* is indispensable for initial early OFT formation and proper cardiogenesis  
22 in the zebrafish embryo.

23

24

25

## 1 DISCUSSION

2 Our work represents the first detailed *in vivo* characterization of *dlc1* and *dlc3* in a vertebrate  
3 model that can survive several days despite severe cardiovascular phenotypes. While many  
4 excellent cell culture studies provided topical and cancer-related pathophysiological data on  
5 Dlc1's functions, they ultimately lack the anatomical context of a whole animal. This makes it  
6 difficult to fully understand the physiological role of the Dlc1 protein, in particular when  
7 neighboring tissues and cell complexes are missing to provide a contextual scaffold. This in  
8 turn may influence the occurrence and consequential manifestation of multifaceted and/or  
9 spatially distinct phenotypes.

10 We showed that *dlc1* and *dlc3* are initially expressed in the LPM and become enriched in ECs  
11 during zebrafish development. The overexpression of DLC1 in human cells results in enhanced  
12 velocity of migrating cells and a loss of their directionality due to dephosphorylation of focal  
13 adhesion proteins<sup>19</sup>. We found that those alterations of cell migration translated into differential  
14 phenotypes at two distinct anatomical sites in the zebrafish. While gain-of-function greatly  
15 affected angiogenic sprouting in the zebrafish trunk, causing mis- and hyperbranching ISV  
16 growth, we also observed an uneven leading edge of ECs, as well as a disrupted EC layer during  
17 CCV growth. The specificity of the trunk phenotype was confirmed by rescuing the aberrant  
18 ISV sprouting phenotype through inhibiting the final activation step of Dlc1 using a specific  
19 PP2A inhibitor. This mechanism was previously described by Ravi and colleagues<sup>18</sup> in  
20 epithelial cell culture studies and appears to be globally conserved *in vivo*.

21 In zebrafish, the loss of directional vessel growth is associated with deficient Sema3a/PlxnD1  
22 signaling during trunk angiogenesis<sup>20</sup> and this pathway directly interacts with the  
23 Vegfa/Kdr1/Nrp1 axis<sup>21,22</sup>. We found that *dlc1* overexpression can prevent the arrest of ISV  
24 growth induced by Vegfr2 pathway inhibition, suggesting that Dlc1 acts directly downstream  
25 of the Kdr1 axis *in vivo*. In addition to ISV hyperbranching following *dlc1* overexpression, we

1 observed altered migration patterns of ECs during CCV growth. This phenotype has been  
2 described in *sema3d*-deficient zebrafish embryos<sup>17</sup>, as *Sema3d* regulates CCV growth in a  
3 *plxnd1*-dependent manner<sup>17</sup>. Furthermore, *Sema3d* undergoes EC-specific autocrine signaling  
4 through *Nrp1* to modulate actin network organization via RhoA and ROCK<sup>17</sup>, which is  
5 important to preserve the EC sheet integrity. In line with this study, we showed that *sema3d*  
6 mRNA injection exclusively rescued the uneven growth of the front and edges of the CCV,  
7 while rat *Nrp1* mRNA solely rescued the integrity of the endothelial layer in temporally  
8 controlled *dlc1* overexpression experiments. During angiogenesis, attractive and repulsive  
9 signaling cues need to be translated into cytoskeletal rearrangements. NRP1-knockdown *in*  
10 *vitro* disrupts F-actin network organization in HUVECs<sup>23</sup>, suggesting a direct interaction of  
11 NRP1 and RHOA-mediated actin cytoskeletal rearrangements. Consequently, overexpression  
12 of truncated *dlc1* mRNA encoding the GAP and START domains was sufficient to induce a  
13 similar, but milder CCV phenotype, compared to full-length *dlc1* overexpression. This indicates  
14 that the disruption of the straight growing edge and lesions in the EC sheet are a result of Dlc1  
15 GAP-dependent inactivation of RhoA, which could be partially rescued by a RhoA activator.  
16 These results support the role of Dlc1 in orchestrating EC migration via the *Sema3d/Plxnd1*, as  
17 well as the *Nrp1/Rhoa* axis during CCV growth in zebrafish. We propose that *dlc* RhoGAPs  
18 may represent a functional link in translating pro- (VEGF) and anti-angiogenic (*Sema3/Nrp1*)  
19 guidance cues into cytoskeletal rearrangements *in vivo*. However, it is still unclear how *dlc1*  
20 precisely affects single components of the actin cytoskeletal machinery *in vivo* during  
21 angiogenesis, and how it interacts with the *Sema3/Nrp1* axis.

22 Our results confirm that Dlc1 activation requires dephosphorylation *in vivo*, which is consistent  
23 with *in vitro* results that showed ERK-mediated phosphorylation-dephosphorylation cycles are  
24 essential for DLC1 to become fully functional<sup>18</sup>. ERK inactivation of FAK triggers the release  
25 of the activated FAK binding complex. This enables PP2A-mediated dephosphorylation of the

1 Ser-(P)308 and Thr-(P)301 residues in DLC1, leading to its activation<sup>18</sup>. FAK represents an  
2 important component in this signaling cascade and it can also be inactivated following  
3 dephosphorylation by Sema3E *in vitro*, thereby modulating anti-angiogenic signaling<sup>24</sup>. We  
4 propose that Dlc1 acts downstream of the Vegfa/Kdr1/Nrp1 signaling cascade (Fig. 6), while  
5 undergoing the phosphorylation-dephosphorylation cycle and subsequently inactivating RhoA,  
6 which was previously described *in vitro*<sup>18</sup> (Fig. 6). Moreover, our data also suggests that *dlc1*  
7 acts downstream of the Sema3/PlxnD1 axis (Fig. 6), thereby providing a functional link  
8 between guidance cues and cytoskeletal rearrangements to control directed EC migration *in*  
9 *vivo*.

10 Proper ISV growth was severely impaired in *dlc1* and *dlc3* morphants and diametrically  
11 opposite to the gain-of-function phenotype. Time-lapse analysis showed that *dlc1*-deficient  
12 embryos displayed abnormal ISV growth including stalled sprouts, extension defects, and in  
13 severe cases, the formation of vascular plexi instead of elongated vessels. As tip and stalk cell  
14 identities appeared normal in *dlc1* morphants, an explanation for this phenotype could be the  
15 aberrant function of repellent guidance cues. A stalling phenotype for growing ISVs has also  
16 been described in global *sema3d*-KO experiments<sup>17</sup>. However, further investigation is needed  
17 to identify which Class 3 Semaphorin is involved in conjunction with PlxnD1/Nrp1 in *dlc*  
18 morphants. While ISV development was impaired in *dlc1* morphants but not in mutants, we  
19 believe several factors could potentially be responsible for this variance. One explanation could  
20 be a partial genetic compensation by other *dlc* family members or even other genes. Another  
21 reason could be the fact that proper angiogenesis and lumenization of vessels depend on  
22 sufficient blood flow and shear forces, both of which are impaired in several circumstances of  
23 the observed *dlc1* mutant phenotypes. Those alterations might mask the emergence and  
24 penetrance of an ISV phenotype in *dlc1<sup>null</sup>* embryos.

1 Besides its role in angiogenesis, knockout of *dlc1* impaired proper AA1/LDA patterning as well  
2 as OFT development. AA1/LDA stenosis could be linked to a defective epithelial-to-  
3 mesenchymal transition (EMT), a process that converts immobilized ECs into highly motile  
4 cells that are able to move through the extracellular matrix. EMT is crucial in the development  
5 of most adult tissues and organs<sup>25</sup>, especially the heart<sup>26</sup>. It involves tight regulation of  
6 differential expression and/or activation of RhoGTPases<sup>27</sup>, among others. Effects on proper  
7 EMT has been associated with ectopic DLC1 expression in nasopharyngeal carcinoma cells<sup>28</sup>,  
8 it is plausible that a similar mechanism could contribute to proper AA1/LDA patterning and  
9 OFT development in the zebrafish. Defects in OFT development are the cause in 30% of  
10 congenital heart defects (CHD) in humans<sup>29</sup>. Similarly, we showed that the formation of the  
11 immature cardiac OFT is defective in *dlc1* and *dlc1/dlc3* double zebrafish mutants resulting in  
12 embryonic lethality around 5dpf. Cardiac morphogenesis has been shown to be dependent on  
13 RhoGTPase signaling and proper EMT in chick and mice<sup>30,31</sup>. Furthermore, mutations in  
14 *PLXND1* are associated with truncus arteriosus in humans, which was recapitulated in  
15 *PlxnD1<sup>null</sup>* mice that die shortly after birth<sup>22,32</sup>. These mice exhibit defective aortic arch arteries,  
16 persistent truncus arteriosus and septal defects<sup>33</sup>. Additionally, this cardiac phenotype is  
17 dependent on the GAP domain of *PlxnD1* and similar defects have been observed in *Sema3C*  
18 and *Nrp1<sup>null</sup>* mice<sup>34-35,36</sup>. Plexins have previously been shown to bind RhoGTPases<sup>37</sup>, it is  
19 possible that RhoA and its regulators, such as *Dlc1*, could be present nearby to transduce signals  
20 to the actin cytoskeleton to direct EC migration and EMT.

21 Isolated hearts from *dlc1<sup>null</sup>* zebrafish mutants showed increased *plxnd1* and *kdrl* expression  
22 compared to WT hearts, whereas *myl7* remained largely unchanged. The overall expression  
23 level of *bmp4* was unaltered in mutant compared to WT hearts, however there was a striking  
24 change in its expression pattern. The alterations in the *bmp4* expression pattern in *dlc1<sup>null</sup>*  
25 embryos could point towards an impaired migration of *bmp4*-expressing cells in the *dlc1<sup>null</sup>*

1 zebrafish heart. It is unlikely that *bmp4* distribution was affected by the abnormal heart shape  
2 as *dlc1* morphants displayed the same altered *bmp4* expression pattern, without showing the  
3 OFT defects seen in mutants. It is very likely that the observed AA1 phenotypes and the  
4 disrupted OFT development are interdependent, as a recent study showed that ECs from the  
5 aortic arches, in particular the AA1, migrate and contribute to OFT formation<sup>38</sup>. However,  
6 attempts to image OFT and AA1/LDA formation using time-lapse microscopy were prevented  
7 by the delayed folding speed of the eGFP fluorophore in our transgenic lines and the depth of  
8 the immature OFT within the tissue at 20-22 hpf. Future studies of the earliest events in OFT  
9 formation would benefit from the generation of transgenic *dlc* mutants with fast superfolding  
10 enhanced fluorophores<sup>39</sup> and the use of specialized microscopy equipment, such as the light  
11 sheet fluorescence microscope or SPIM.

12 The role of *dlc3* during cardiovascular development remains elusive as no cardiac phenotypes  
13 were observed in mutants. However, our data suggest a partial redundancy with *dlc1*, while  
14 *dlc2* seemed not involved in this process. Future experiments should address potential  
15 compensatory mechanisms between the three family members. It is noteworthy that the  
16 zebrafish *dlc1* mutant displays a causative phenotype of CHD, which is congruent with the  
17 enrichment of rare DLC1 variants in human CHD patients<sup>15</sup>. As genetic models of sporadic  
18 CHD are rare and the *Dlc1* mutation causes early intrauterine embryonic lethality in the mouse  
19 model<sup>9</sup>, the zebrafish *dlc1* mutant will provide a valuable tool to study the underlying  
20 mechanisms involved in early OFT development.

21  
22  
23  
24  
25

## 1 MATERIALS AND METHODS

### 2 Zebrafish husbandry and maintenance

3 Zebrafish procedures were approved by the Geneva Veterinary Office and were performed  
4 according to the guidelines from Directive 2010/63/EU of the European Parliament. All  
5 experiments were performed using the AB\* wildtype strain and the following transgenic  
6 animals: Tg(*kdr1:eGFP*)<sup>s843 40</sup>, Tg(*gatal:dsRed*)<sup>sd2 41</sup>, Tg(*fli1a:lifeact-GFP*)<sup>mu240 17</sup> and  
7 Tg(*myl7:dsRed*)<sup>s879 42</sup>. Embryos were dechorionated at 24 hpf and incubated with 0.002% PTU  
8 to prevent pigment formation. Embryos and larvae were anaesthetized with 0.2 mg per mL of  
9 Tricaine methanesulfonate (MS-222) in E3 medium by immersion. For fixation, the embryos  
10 and larvae (older than 24 hpf) were first anaesthetized with Tricaine and subsequently fixed in  
11 4% cold paraformaldehyde (PFA).

12

### 13 mRNA and Morpholino injections

14 mRNA was transcribed using the mMessage mMachine Kit SP6 (Ambion) according to the  
15 manufacturer protocol from a linearized pCS2 vector containing the open reading frame of the  
16 polymerase chain reaction amplified product. After transcription, the mRNA was purified by  
17 phenol-chloroform extraction and resuspended in RNase-free water. 1 nL containing 100-200  
18 pg of full length mRNA or the stated concentration of the respective Morpholinos (MO,  
19 purchased from Gene Tools) were injected into 1-4 cell stage embryos.

20 *dlc1*-MO 5'-AGTCTTCACTCTGAAACGATATGGA-3', *dlc3*-MO

21 5'-CTCTGCTGATGGTAACAGACACAGA-3', standard control MO,

22 5'-CCTCTTACCTCAGTTACAATTTATA-3'.

23

24

25



## 1 **Generation of transgenic lines (Tol2) and mutant lines (CRISPR/Cas9)**

2 For Tg(*hsp70l:dlc1-p2a-TFP*) fish generation, the sequence for the zebrafish *dlc1* (without the  
3 STOP codon), was inserted in a Tol2 vector containing the *hsp70l:xxp2a-TFP* sequence (kind  
4 gift from Prof. B. Martin, Stony Brooks University, NY) by In Fusion (Clontech) cloning. For  
5 transgenesis, 1-cell stage embryos were injected with 30 pg of the final Tol2 vector, along with  
6 30 pg Tol2 mRNA.

7 For CRISPR/Cas9-mediated generation of *dlc1* and *dlc3* mutants, single-guide RNA was  
8 generated by annealing oligonucleotides at 95°C for 5 min, and then 22°C for 45 min. The  
9 samples were diluted 20-fold and ligated into the pDR274 plasmid (kind gift from Keith Joung;  
10 Addgene plasmid 42250), which was previously linearized with BsaI. Guide RNA was  
11 generated using the MEGAshortscript T7 kit (Ambion). 500 pg recombinant Cas9 protein  
12 (PNAbio) and 250 pg of the guide RNA were co-injected per embryo. The guide RNA  
13 sequences for *dlc1* were: 5'-GGACCTTAGCGAGCAGCCAG-3' and for *dlc3*:  
14 5-CAGGCAACCGCTCCTCAACC-3'. Embryos were screened using primers that flanked the  
15 target region (Supplemental Table 2), and mutant alleles identified by sequencing.

16

## 17 **Whole-mount *in situ* hybridization**

18 Whole-mount *in situ* hybridization (WISH) was performed on 4% PFA-fixed embryos as  
19 previously described<sup>43</sup>. In brief, RNA probes were generated by linearization of TOPO-TA  
20 vectors (Invitrogen) containing the PCR-amplified cDNA sequence. Digoxigenin- or FITC-  
21 labeled antisense probes were synthesized using an RNA Labeling Kit (SP6/T7; Roche). The  
22 staining was revealed with NBT/BCIP or INT/BCIP substrate (Roche). Embryos were imaged  
23 in 100% glycerol, using an Olympus MVX10 microscope. Oligonucleotide primers used to  
24 amplify and clone cDNA for the production of WISH probes are listed in Supplemental Table  
25 2.

## 1 **Cryosections**

2 Fixed embryos were subjected to WISH staining and washed afterwards in methanol, followed  
3 by PBS. Embryos were mounted in OCT and frozen at -20°C. 5 µm thick sections were obtained  
4 using a Cryostat, the consecutive sections were then transferred to Superfrost Microscope slides  
5 and stored at -20°C. Sections were defrosted and mounted in Glycerol shortly before imaging  
6 on a Zeiss Axioskop 2 plus.

7

## 8 **Heat shock and chemical inhibitor treatments**

9 Heat shock was performed at the 13-somite stage (ss) of embryonic development for 45 min in  
10 a 39°C water bath. Embryos were returned to 1xE3 (room temperature) and incubated at 28°C.  
11 Subsequent chemical inhibitor treatments were performed 0.5-1 hour after the heat shock and  
12 incubated for the stated times at 28°C in the dark. The chemicals were diluted in 1xE3 in the  
13 following concentrations: 1.5µM of the *VEGFR2* inhibitor SU5416 (Selleckchem) and 15nM  
14 Okadaic acid (Enzo).

15

## 16 **Confocal microscopy**

17 Live (anaesthetized) embryos were embedded in 0.5% agarose supplied with 0.07 mg per mL  
18 Tricaine in E3 in a glass-bottom dish. Confocal imaging was performed using a Nikon inverted  
19 A1r spectral. For time-lapse experiments, embryos were imaged in a heated chamber at 28°C  
20 overnight. The larvae were kept anaesthetized for the duration of the experiment (several hours  
21 to overnight). Images were analyzed and the contrast and brightness equally adjusted using the  
22 FIJI (ImageJ) software.

23

## 24 **Microangiography**

25 3-4 nl of 2 mg per mL Rhodamine B isothiocyanate-Dextran (70kDa, Sigma) dissolved in PBS  
26 and 5 mM HEPES were injected into the sinus venosus of 30 hpf embryos. For this, the embryos

1 were anesthetized with Tricaine, placed dorsally into an injection mold and fixed in place by  
2 applying 3% Methylcellulose. Embryos were immediately imaged after the injection ( $\leq$  30  
3 min).

4

## 5 **FACS**

6 Embryos were dissociated in 0.9x ice-cold PBS using 0.5mg per mL Liberase (Roche) then  
7 resuspended in 0.9x PBS/1% FCS. Dead cells were excluded by SYTOX-red (Life  
8 Technologies) staining. Cell sorting was performed using an Aria II (BD Biosciences). Sorted  
9 cells were collected in RLT buffer (Qiagen) and frozen at  $-80^{\circ}\text{C}$ .

10

## 11 **Heart isolation**

12 Isolation of embryonic hearts was performed in general as previously described<sup>44</sup> with slight  
13 adjustments. Batches of not more than 20 embryos were anaesthetized in Tricaine/E3 and  
14 washed three times with ice cold Leibovitz' L15 medium (Invitrogen) supplemented with 10%  
15 FCS. The embryos were then mechanically dissociated (20-30x) in L15 medium/10% FCS  
16 using a syringe and 19G needle mounted to a ring stand and directly transferred to a petri dish  
17 containing the same medium. Intact isolated hearts were manually collected with a P20 pipette  
18 (5-10 hearts per pool) and immediately placed on ice. Identification of the hearts was achieved  
19 by a combination of DIC microscopy and fluorescently marked hearts in the transgenic lines  
20 *kdrl:eGFP* (endocardium) or *myl7:dsRed* (cardiomyocytes). After mechanical dissociation of  
21 the hearts in 0.9x PBS using a 27G needle, heart cells were recovered and resuspended in RLT  
22 buffer.

23

24

25

## 1 **RNA extraction, cDNA synthesis and quantitative real-time PCR**

2 RNA was extracted using the RNeasy Minikit (Qiagen) according to the manufacturer protocol  
3 and reverse transcribed into cDNA using the Superscript III kit (Invitrogen) or the qScript Kit  
4 (Quantabio). Quantitative real-time PCR (qPCR) was performed using the KAPA SYBR FAST  
5 Universal qPCR Kit (KAPA BIOSYSTEMS) in a QuantStudio3 system (Life Technology). All  
6 primers used are listed in Supplemental Table 2.

7

## 8 **Statistical analysis and Reproducibility**

9 Each experiment has been performed at least 3 times on different experimental days (biological  
10 replicates; N). Embryos were individually assessed on the day of the experiment and the data  
11 pooled for graphical and statistical analysis. The total and pooled numbers of embryos within a  
12 full set of experiments (N = 3) was defined as n. Specific n values are presented above bar  
13 graphs per condition where applicable. All data in graph bars represent the mean  $\pm$  SD. Stacked  
14 bar graphs containing multiple groups display only the mean for clarity. Statistical significance  
15 of differences between 2 groups was determined using an unpaired, 2-tailed *t* test, while the  
16 significance of multiple groups was determined using a 1-way ANOVA with Dunnett's post  
17 hoc correction. To analyze the independence of the occurrence of the *dlc1* mutant phenotype  
18 after *dlc3* MO injection, the Fisher's exact test was used. P values of less than 0.05 were  
19 considered statistically significant. All statistical analyses were performed using GraphPad  
20 Prism 8.0 (GraphPad Software).

21

## 22 **Data availability**

23 The datasets generated during and/or analysed during the current study are available from the  
24 corresponding author on reasonable request.

25

## 1 **References**

- 2 1 Wong, C. M., Lee, J. M., Ching, Y. P., Jin, D. Y. & Ng, I. O. Genetic and epigenetic  
3 alterations of DLC-1 gene in hepatocellular carcinoma. *Cancer research* **63**, 7646-7651  
4 (2003).
- 5 2 Ullmannova, V. & Popescu, N. C. Expression profile of the tumor suppressor genes  
6 DLC-1 and DLC-2 in solid tumors. *International journal of oncology* **29**, 1127-1132  
7 (2006).
- 8 3 Durkin, M. E. *et al.* DLC-1: a Rho GTPase-activating protein and tumour suppressor.  
9 *Journal of cellular and molecular medicine* **11**, 1185-1207, doi:10.1111/j.1582-  
10 4934.2007.00098.x (2007).
- 11 4 Qian, X. *et al.* Oncogenic inhibition by a deleted in liver cancer gene requires  
12 cooperation between tensin binding and Rho-specific GTPase-activating protein  
13 activities. *Proceedings of the National Academy of Sciences of the United States of*  
14 *America* **104**, 9012-9017, doi:10.1073/pnas.0703033104 (2007).
- 15 5 Durkin, M. E., Yuan, B. Z., Thorgeirsson, S. S. & Popescu, N. C. Gene structure, tissue  
16 expression, and linkage mapping of the mouse DLC-1 gene (Arhgap7). *Gene* **288**, 119-  
17 127 (2002).
- 18 6 Kim, T. Y. *et al.* DLC-1, a GTPase-activating protein for Rho, is associated with cell  
19 proliferation, morphology, and migration in human hepatocellular carcinoma.  
20 *Biochemical and biophysical research communications* **355**, 72-77,  
21 doi:10.1016/j.bbrc.2007.01.121 (2007).
- 22 7 Takahashi, H. & Shibuya, M. The vascular endothelial growth factor (VEGF)/VEGF  
23 receptor system and its role under physiological and pathological conditions. *Clinical*  
24 *science (London, England : 1979)* **109**, 227-241, doi:10.1042/cs20040370 (2005).
- 25 8 Ferrara, N., Gerber, H. P. & LeCouter, J. The biology of VEGF and its receptors. *Nature*  
26 *medicine* **9**, 669-676, doi:10.1038/nm0603-669 (2003).
- 27 9 Durkin, M. E. *et al.* DLC-1, a Rho GTPase-activating protein with tumor suppressor  
28 function, is essential for embryonic development. *FEBS letters* **579**, 1191-1196,  
29 doi:10.1016/j.febslet.2004.12.090 (2005).
- 30 10 Liu, J. A. *et al.* Asymmetric localization of DLC1 defines avian trunk neural crest  
31 polarity for directional delamination and migration. *Nature communications* **8**, 1185,  
32 doi:10.1038/s41467-017-01107-0 (2017).

- 1 11 Sabbir, M. G. *et al.* Identification and characterization of Dlc1 isoforms in the mouse  
2 and study of the biological function of a single gene trapped isoform. *BMC biology* **8**,  
3 17, doi:10.1186/1741-7007-8-17 (2010).
- 4 12 Shih, Y. P., Yuan, S. Y. & Lo, S. H. Down-regulation of DLC1 in endothelial cells  
5 compromises the angiogenesis process. *Cancer letters* **398**, 46-51,  
6 doi:10.1016/j.canlet.2017.04.004 (2017).
- 7 13 Denholm, B. *et al.* crossveinless-c is a RhoGAP required for actin reorganisation during  
8 morphogenesis. *Development* **132**, 2389-2400, doi:10.1242/dev.01829 (2005).
- 9 14 Sato, D., Sugimura, K., Satoh, D. & Uemura, T. Crossveinless-c, the Drosophila  
10 homolog of tumor suppressor DLC1, regulates directional elongation of dendritic  
11 branches via down-regulating Rho1 activity. *Genes to cells : devoted to molecular &*  
12 *cellular mechanisms* **15**, 485-500, doi:10.1111/j.1365-2443.2010.01399.x (2010).
- 13 15 Lin, B. *et al.* Uncovering the rare variants of DLC1 isoform 1 and their functional effects  
14 in a Chinese sporadic congenital heart disease cohort. *PloS one* **9**, e90215,  
15 doi:10.1371/journal.pone.0090215 (2014).
- 16 16 Yau, T. O. *et al.* Deleted in liver cancer 2 (DLC2) was dispensable for development and  
17 its deficiency did not aggravate hepatocarcinogenesis. *PloS one* **4**, e6566,  
18 doi:10.1371/journal.pone.0006566 (2009).
- 19 17 Hamm, M. J., Kirchmaier, B. C. & Herzog, W. Sema3d controls collective endothelial  
20 cell migration by distinct mechanisms via Nrp1 and PlxnD1. *The Journal of cell biology*  
21 **215**, 415-430, doi:10.1083/jcb.201603100 (2016).
- 22 18 Ravi, A., Kaushik, S., Ravichandran, A., Pan, C. Q. & Low, B. C. Epidermal growth  
23 factor activates the Rho GTPase-activating protein (GAP) Deleted in Liver Cancer 1 via  
24 focal adhesion kinase and protein phosphatase 2A. *The Journal of biological chemistry*  
25 **290**, 4149-4162, doi:10.1074/jbc.M114.616839 (2015).
- 26 19 Kim, T. Y. *et al.* Effects of structure of Rho GTPase-activating protein DLC-1 on cell  
27 morphology and migration. *The Journal of biological chemistry* **283**, 32762-32770,  
28 doi:10.1074/jbc.M800617200 (2008).
- 29 20 Torres-Vazquez, J. *et al.* Semaphorin-plexin signaling guides patterning of the  
30 developing vasculature. *Developmental cell* **7**, 117-123,  
31 doi:10.1016/j.devcel.2004.06.008 (2004).
- 32 21 Miao, H. Q. *et al.* Neuropilin-1 mediates collapsin-1/semaphorin III inhibition of  
33 endothelial cell motility: functional competition of collapsin-1 and vascular endothelial  
34 growth factor-165. *The Journal of cell biology* **146**, 233-242 (1999).

- 1 22 Gitler, A. D., Lu, M. M. & Epstein, J. A. PlexinD1 and semaphorin signaling are  
2 required in endothelial cells for cardiovascular development. *Developmental cell* **7**, 107-  
3 116, doi:10.1016/j.devcel.2004.06.002 (2004).
- 4 23 Yang, W. J. *et al.* Semaphorin-3C signals through Neuropilin-1 and PlexinD1 receptors  
5 to inhibit pathological angiogenesis. *EMBO molecular medicine* **7**, 1267-1284,  
6 doi:10.15252/emmm.201404922 (2015).
- 7 24 Sakurai, A. *et al.* Semaphorin 3E initiates antiangiogenic signaling through plexin D1  
8 by regulating Arf6 and R-Ras. *Molecular and cellular biology* **30**, 3086-3098,  
9 doi:10.1128/mcb.01652-09 (2010).
- 10 25 Perez-Pomares, J. M. & Munoz-Chapuli, R. Epithelial-mesenchymal transitions: a  
11 mesodermal cell strategy for evolutive innovation in Metazoans. *The Anatomical record*  
12 **268**, 343-351, doi:10.1002/ar.10165 (2002).
- 13 26 von Gise, A. & Pu, W. T. Endocardial and epicardial epithelial to mesenchymal  
14 transitions in heart development and disease. *Circulation research* **110**, 1628-1645,  
15 doi:10.1161/circresaha.111.259960 (2012).
- 16 27 Nakaya, Y., Sukowati, E. W., Wu, Y. & Sheng, G. RhoA and microtubule dynamics  
17 control cell-basement membrane interaction in EMT during gastrulation. *Nature cell*  
18 *biology* **10**, 765-775, doi:10.1038/ncb1739 (2008).
- 19 28 Huang, W. *et al.* DLC-1 induces mitochondrial apoptosis and epithelial mesenchymal  
20 transition arrest in nasopharyngeal carcinoma by targeting EGFR/Akt/NF- $\kappa$ B pathway.  
21 *Medical oncology (Northwood, London, England)* **32**, 115, doi:10.1007/s12032-015-  
22 0564-4 (2015).
- 23 29 Srivastava, D. & Olson, E. N. A genetic blueprint for cardiac development. *Nature* **407**,  
24 221-226, doi:10.1038/35025190 (2000).
- 25 30 Wei, L. *et al.* Inhibition of Rho family GTPases by Rho GDP dissociation inhibitor  
26 disrupts cardiac morphogenesis and inhibits cardiomyocyte proliferation. *Development*  
27 **129**, 1705-1714 (2002).
- 28 31 Zhao, Z. & Rivkees, S. A. Rho-associated kinases play an essential role in cardiac  
29 morphogenesis and cardiomyocyte proliferation. *Developmental dynamics : an official*  
30 *publication of the American Association of Anatomists* **226**, 24-32,  
31 doi:10.1002/dvdy.10212 (2003).
- 32 32 Zhang, Y. *et al.* Tie2Cre-mediated inactivation of plexinD1 results in congenital heart,  
33 vascular and skeletal defects. *Developmental biology* **325**, 82-93,  
34 doi:10.1016/j.ydbio.2008.09.031 (2009).

- 1 33 Ta-Shma, A. *et al.* Isolated truncus arteriosus associated with a mutation in the plexin-  
2 D1 gene. *American journal of medical genetics. Part A* **161a**, 3115-3120,  
3 doi:10.1002/ajmg.a.36194 (2013).
- 4 34 Worzfeld, T. *et al.* Genetic dissection of plexin signaling in vivo. *Proceedings of the*  
5 *National Academy of Sciences of the United States of America* **111**, 2194-2199,  
6 doi:10.1073/pnas.1308418111 (2014).
- 7 35 Feiner, L. *et al.* Targeted disruption of semaphorin 3C leads to persistent truncus  
8 arteriosus and aortic arch interruption. *Development* **128**, 3061-3070 (2001).
- 9 36 Gu, C. *et al.* Neuropilin-1 conveys semaphorin and VEGF signaling during neural and  
10 cardiovascular development. *Developmental cell* **5**, 45-57 (2003).
- 11 37 Tong, Y. *et al.* Binding of Rac1, Rnd1, and RhoD to a novel Rho GTPase interaction  
12 motif destabilizes dimerization of the plexin-B1 effector domain. *The Journal of*  
13 *biological chemistry* **282**, 37215-37224, doi:10.1074/jbc.M703800200 (2007).
- 14 38 Sidhwani, P. *et al.* Cardiac function modulates endocardial cell dynamics to shape the  
15 cardiac outflow tract. *Development* **147**, doi:10.1242/dev.185900 (2020).
- 16 39 Coombs, C. *et al.* Chemokine receptor trafficking coordinates neutrophil clustering and  
17 dispersal at wounds in zebrafish. *Nature communications* **10**, 5166,  
18 doi:10.1038/s41467-019-13107-3 (2019).
- 19 40 Jin, S.-W., Beis, D., Mitchell, T., Chen, J.-N. & Stainier, D. Y. R. Cellular and  
20 molecular analyses of vascular tube and lumen formation in zebrafish. *Development*  
21 **132**, 5199-5209, doi:10.1242/dev.02087 (2005).
- 22 41 Traver, D. *et al.* Transplantation and in vivo imaging of multilineage engraftment in  
23 zebrafish bloodless mutants. *Nature immunology* **4**, 1238-1246, doi:10.1038/ni1007  
24 (2003).
- 25 42 Chi, N. C. *et al.* Foxn4 directly regulates tbx2b expression and atrioventricular canal  
26 formation. *Genes & development* **22**, 734-739, doi:10.1101/gad.1629408 (2008).
- 27 43 Thisse, C. & Thisse, B. High-resolution in situ hybridization to whole-mount zebrafish  
28 embryos. *Nature protocols* **3**, 59-69, doi:10.1038/nprot.2007.514 (2008).
- 29 44 Burns, C. G. & MacRae, C. A. Purification of hearts from zebrafish embryos.  
30 *BioTechniques* **40**, 274, 276, 278 passim (2006).

31  
32  
33  
34



1 **Acknowledgements**

2 JYB was founded by the Swiss National Fund (#31003A\_166515), and was endorsed by a Chair  
3 in Life Sciences from the Giorgi-Cavaglieri Foundation. We would like to thank Chantal  
4 Combepine and Corentin Pasche for excellent technical assistance, as well as Dr. W. Herzog  
5 and Dr. Lucia Du for critical reading of the manuscript.

6

7 **Author contributions**

8 TL executed the experimental work. JYB designed the experiments, provided funding and  
9 supervised the research. TL and JYB jointly wrote the manuscript.

10

11 **Conflict of interest**

12 The authors declare no conflict of interest.

13

14

## MAIN FIGURES

**Figure 1**

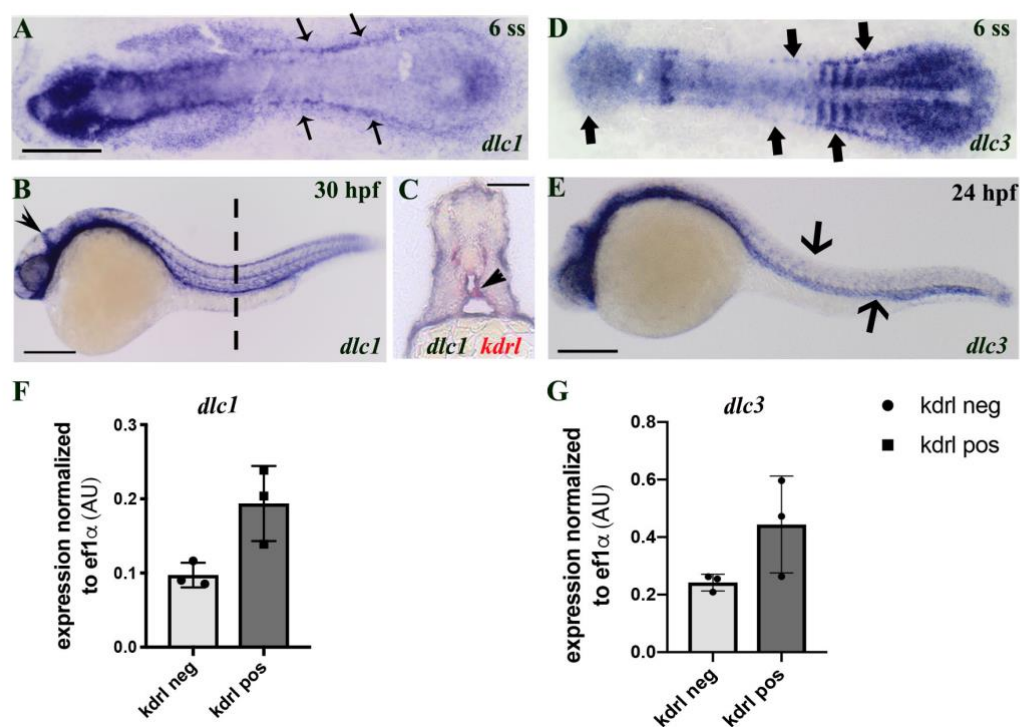

**Fig. 1** *dlc1* and *dlc3* are expressed in the LPM and in endothelial cells

A) shows a flatmounted ISH image of *dlc1* expression in the PLPM at 6 ss (black slim arrows), Scale bar = 250 $\mu$ m. In B) expression of *dlc1* is shown at 30 hpf (Scale bar = 250  $\mu$ m). The pointed arrowhead highlights expression in the midcerebral vessels. A corresponding cross-section of the trunk (level of broken line) and double staining of *kdrl* is shown in C) (solid arrowhead), Scale bar = 100  $\mu$ m. D) and E) show *dlc3* expression at 6 ss and 24 hpf, respectively, Scale bar = 250  $\mu$ m. F) and G) show endothelial expression levels at 26 hpf (in biological triplicates, N = 3). In all images the embryos are oriented with their head to the left and the tail to the right. All in situ experiments have been performed a minimum of three times (N = 3).

**Figure 2**

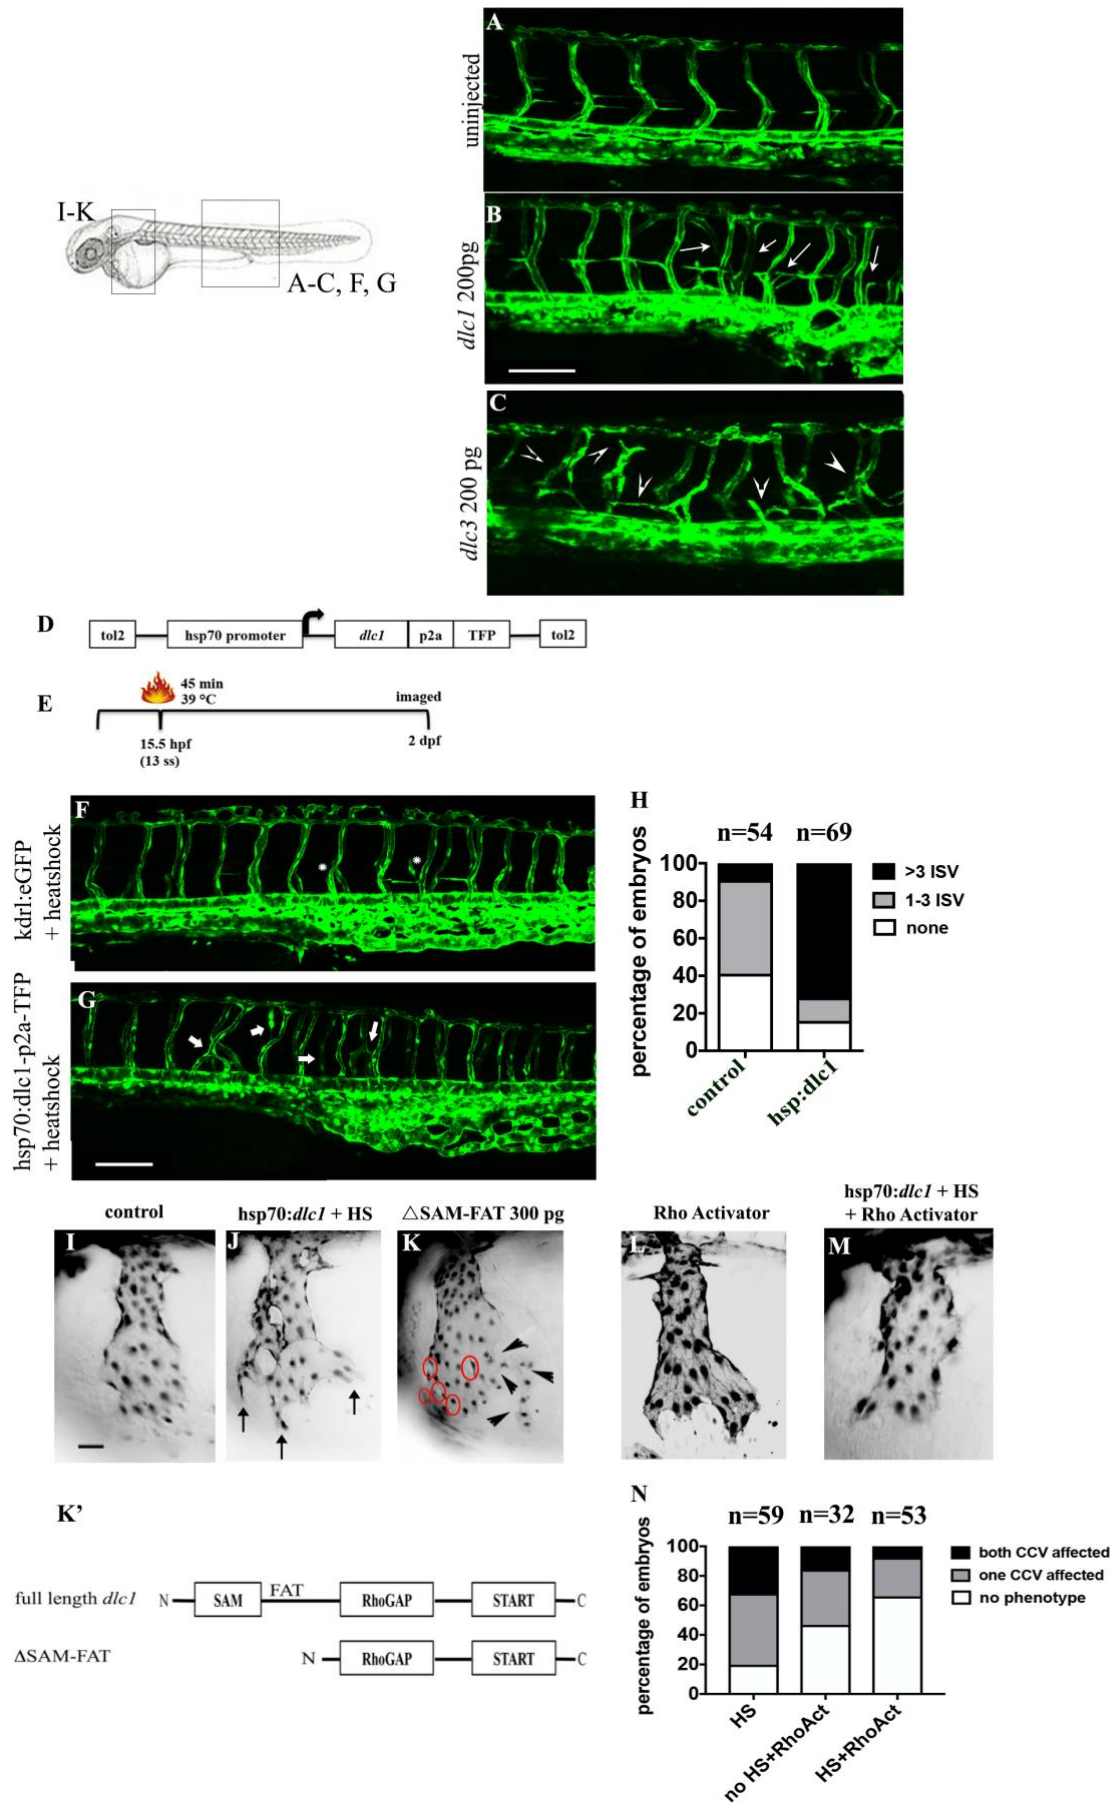

**Fig. 2 Overexpression of *dlc1* and *dlc3* affects angiogenesis in the trunk and the growth of the common cardinal veins, which is RhoGAP-domain dependent**

A) – C) shows an example of *kdrl:eGFP* embryos injected with 200 pg of full length mRNA for *dlc1* (B) and *dlc3* (C), compared to the uninjected control embryo (A), Scale bar = 100  $\mu$ m. Hypersprouting ISVs are indicated with white arrows (*dlc1*, B) and white arrowheads (*dlc3*, C). D) shows a schematic representation of the *hsp70:dlc1-p2a-TFP* construct and E) the heat shock protocol. Temporal overexpression in an exemplary *hsp70:dlc1/kdrl:eGFP* embryo is shown in G) compared to heat shocked *kdrl:EGFP* control embryos in F) and the corresponding quantification of the ISV phenotype in H), Scale bar = 100  $\mu$ m. The same heat-shock exemplary phenotypic ISV example image is used in Fig. 2G and Fig. 3N. The ISV phenotype is quantified as either more than 3 ISVs affected (black), 1-3 ISVs (grey) or no ISVs affected (white, none). Counted ISV phenotypes consisted of bifurcations/hypersprouting, additional smaller sprouts and thin/non-lumenized vessels. I) and J) show the CCVs of *hsp70:dlc1/kdrl:eGFP* embryos either non-heat shocked (I) or heat shocked (J), the uneven leading edge is marked by arrows. The occurrence of a phenotype is quantified in the first bar graph in N). The CCV phenotypes were recapitulated after injection of 300 pg of *dlc1* mRNA lacking the SAM and FAT domain ( $\Delta$ SAM-FAT), only containing the RhoGAP and START domains of *dlc1* (K and K'). The red circles highlight holes in the cell sheet and the solid black arrowheads point to uneven leading edges. L) shows Rho Activator-treated embryos (quantified in the second bar graph in N)) alone. The combined rescue of heat shocked *hsp-dlc1* embryos and Rho Activator treatment is shown in M) (compare with the heat-shock phenotype alone in J)) and is quantified in the third bar graph in N). Scale bar = 50  $\mu$ m. N) shows the quantification of phenotypes observed in J), L) and M). The quantification factors in the percentages of embryos with both of their CCVs affected (black), only one CCV on one arbitrary side (grey) or no CCV phenotype on

either side (white, no phenotype). Any alteration to CCV growth was counted as phenotypic, including holes in the cell sheet and uneven growing fronts/edges. All images show lateral views of the embryo oriented with the head to the left. n indicates the combined total numbers of examined embryos per experimental group from 3 individual experiments (N = 3). The bar graph displays the mean across the 3 pooled experiments.

**Figure 3**

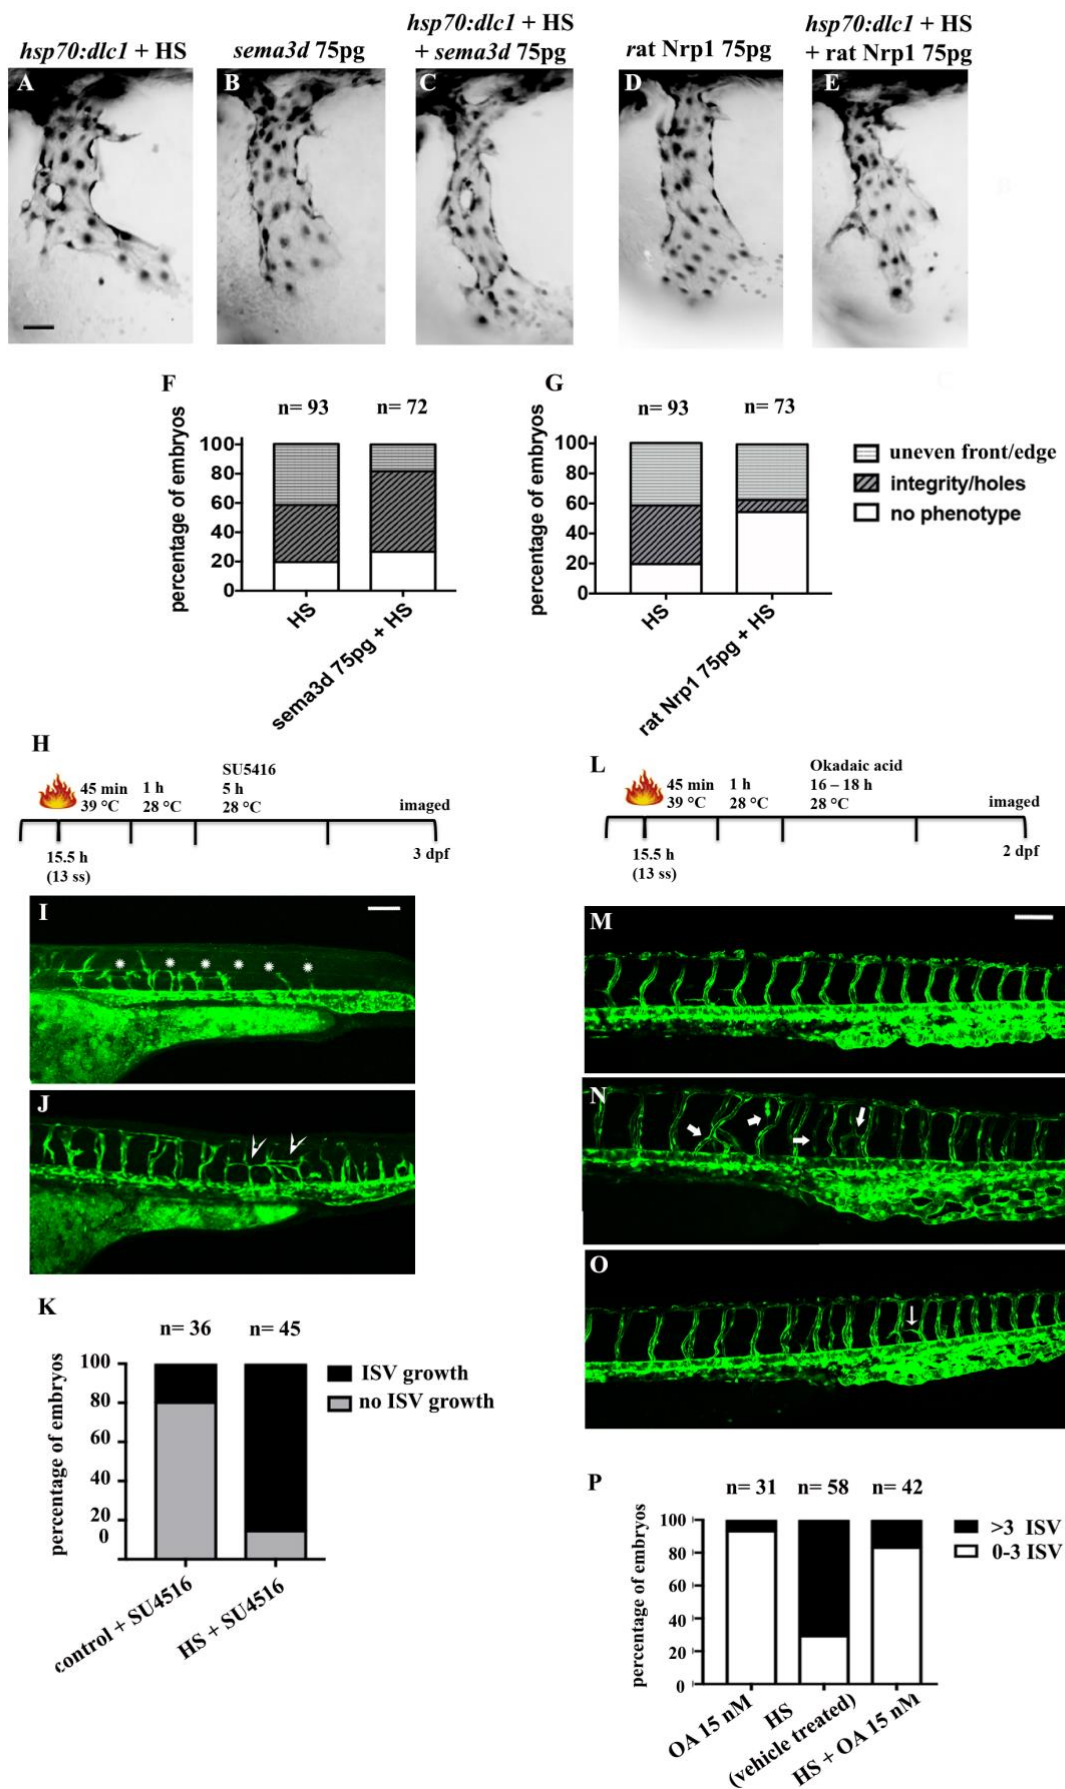

**Fig. 3 *dlc1* acts downstream of VEGF-A/*kdr1*/*Nrp1* signaling and its activity is modulated by phosphorylation**

Heat shocked *hsp70-dlc1* embryos show a combination of different CCV phenotypes after heat shock (A-E)), quantified in F) and G)). A) shows *hsp70:dlc1/kdr1:eGFP* embryos after heat shock (HS); B) injected *hsp70:dlc1/kdr1:eGFP* with 100pg of *sema3d* mRNA alone (no heat shock) and C) the combination of both, which is quantified in F). D) shows injected *hsp70:dlc1/kdr1:eGFP* with 100pg of rat *Nrp1* mRNA alone (no heat shock) and E) the combination of both, which is quantified in G), Scale bar = 50  $\mu$ m. The graphs in F) and G) distinguish between the two differential CCV phenotypes; displaying the percentages of affected embryos with uneven leading edges in light grey (uneven front/edge; F) or the occurrence of holes in the cell sheet as black diagonal stripes (integrity/holes; G). H) shows the schematic setup of the heat shock experiment followed by subsequent SU5416 treatment. A representative image of SU5416 treated embryos on the *hsp70:dlc1/kdr1:eGFP* (control siblings) or *kdr1:eGFP* (wildtype) background that did not receive a heat shock are shown in I) and treated embryos that were additionally heat shocked are shown in J), Scale bar = 100  $\mu$ m. The percentage of embryos that show recovered ISV growth (black), compared to no ISV growth (grey) is quantified in K). All ISV that did not sprout or failed to sprout beyond the horizontal myoseptum were counted as no ISV growth. L) shows the schematic setup of the heat shock experiment followed by subsequent Okadaic acid (OA) treatment. M) shows a *hsp70-dlc1/kdr1:eGFP* embryo treated with OA, N) *hsp70:dlc1/kdr1:eGFP* embryos that were heat shocked (no treatment) and O) *hsp70:dlc1/kdr1:eGFP* embryos that were heat shocked and received OA treatment., Scale bar = 100  $\mu$ m. The same exemplary heat-shock phenotypic ISV example image is shown in Fig. 2G and Fig. 3N. The percentage of affected ISV per condition is quantified in P). The ISV phenotype is quantified as either more than 3 ISVs affected (black) or 0-3 ISVs affected (white). Counted ISV

phenotypes consisted of bifurcations/hypersprouting, additional smaller sprouts and thin/non-lumenized vessels. Images (I, J, M-O) show lateral views of the embryo with the head towards the left. All experiments have been performed 3 times ( $N = 3$ ).  $n$  indicates the combined total pooled numbers of embryos from the 3 individual experiments above each bar graph. The bar graph displays the means of the 3 pooled experiments.



**Figure 4**

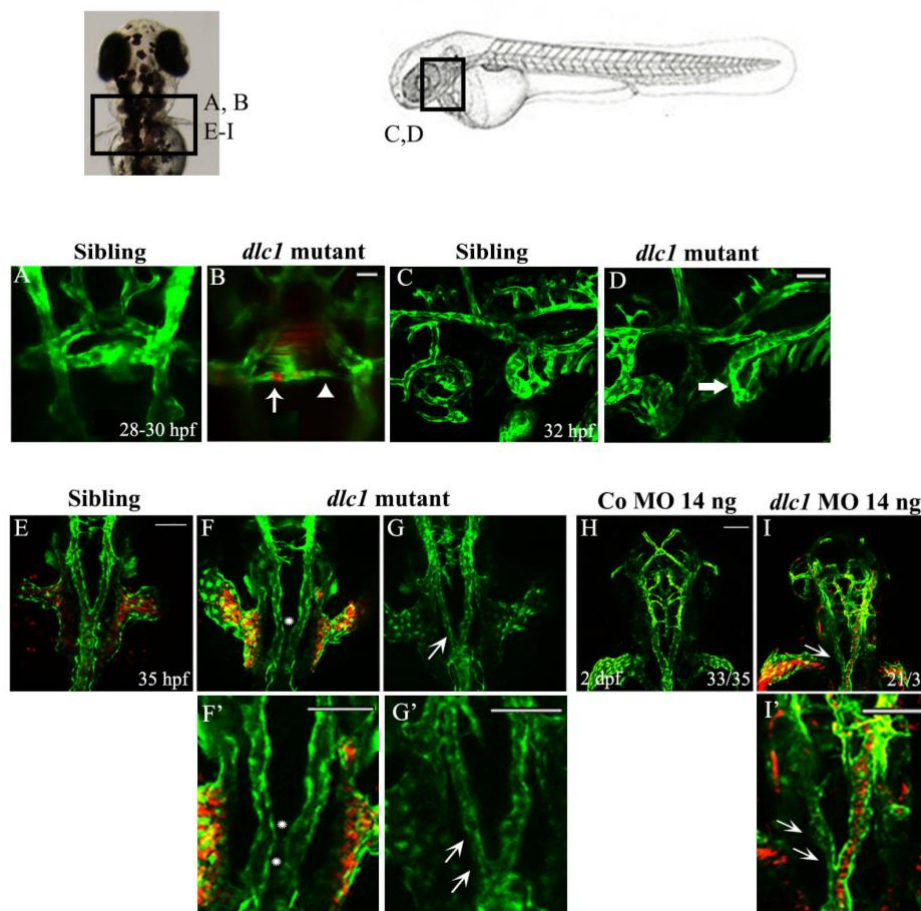

**Fig. 4 Loss of *dlc1* affects the formation of the LDA and AA1s**

A) shows the AA1 of WT/siblings on a *kdrl:eGFP* background (dorsal view). B) shows the *dlc1* mutant with red blood cells (*gata1:dsRed*) trapped in the AA1 (arrow, left) and a stenotic/partially unconnected AA1' (arrowhead, right) at 28-30 hpf, Scale bar = 25  $\mu$ m. C) and D) show lateral views of the looped connection of the LDA to the AA1 in control siblings (C) and in *dlc1* mutants (D), stenosis indicated with a solid arrow) at 32 hpf, Scale bar = 50  $\mu$ m. E) to I) show dorsal views of the LDA. F) and G) show LDA phenotypes in *dlc1* mutants, compared to WT siblings in E) at 35 hpf. The differential mutant LDA phenotypes consist of not properly fused LDA into the single dorsal aorta (asterisk, F) or stenotic LDA (arrow, G) without blood flow. The panels F') and G') show magnifications of the observed phenotypes. All mutant phenotypes have been

observed across several individual experiments ( $n \geq 5$ ) in 1 - 4 embryos per experiment.

I) shows a similar LDA phenotype after *dlc1* MO injection, compared to control MO injected embryos in H) at 48 hpf, Scale bar = 100  $\mu\text{m}$ . The numbers in H) and I) demonstrate the frequency of embryos with the indicated phenotype from one exemplary injection experiment. The panel I') shows a magnification of the observed phenotype. MO injection experiments have been performed at least 3 times. The images B), E), F) and I) include the *gatal:dsRed* transgene to highlight the presence or absence of blood flow.

**Figure 5**

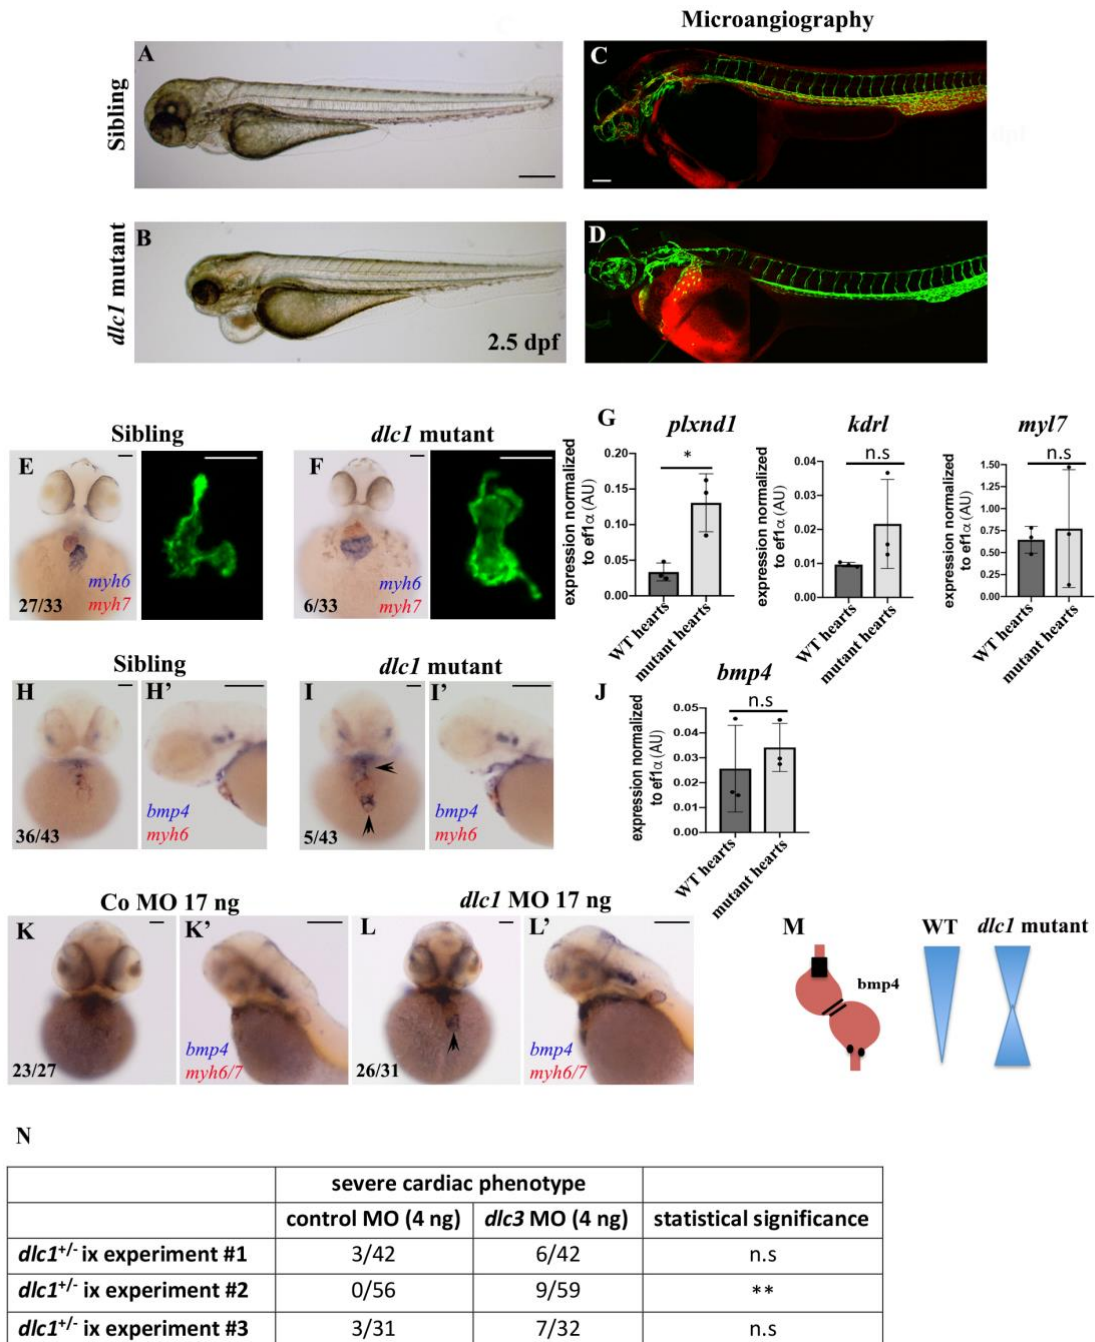

**Fig. 5 The severe phenotype in the *dlc1* mutant as a model of congenital heart defects**

A) – B) show brightfield images of control siblings (A)) and *dlc1* mutants (B)) with the severe heart phenotype, Scale bar = 250  $\mu$ m. C) and D) shows microangiographies with Rhodamine-Dextran (red) for C) control embryos and D) *dlc1* mutants on a *kdrl:eGFP* transgenic background, Scale bar = 100  $\mu$ m. C) and D) show exemplary images from

one experiment, overall the experiment has been performed on  $n = 4$  different mutant embryos in individual experiments ( $N = 3$ ). E) and F) show ventral views of ISH for the heart ventricle (blue, *myh6*) and the atrium (red, *myh7*). The numbers in the ISH image display the frequency of embryos with the indicated staining from one exemplary heterozygous in-cross experiment. Next to the ISH images, isolated hearts on a *kdrl:eGFP* transgenic background of control siblings (E) and *dlc1* mutants are shown with altered heart morphology (F). Scale bars = 100  $\mu\text{m}$ . G) shows qPCR analysis of endocardial (*plxnd1*, *kdrl*) markers and a cardiomyocyte (*myl7*) marker in WT hearts compared to mutant hearts (grey). H) and I) show ventral and H') and I') lateral views of *myh6* (red) and *bmp4* (blue) expression in control siblings (H, H') and *dlc1* mutants (I, I'). H) and I) Scale Bar = 100  $\mu\text{m}$ , H') and I') Scale Bar = 500  $\mu\text{m}$ . qPCR analysis for *bmp4* expression in isolated hearts is shown in J). Statistical significance for qPCR (G and J) was determined using an unpaired, 2-tailed *t* test. *plexind1*  $p = 0.017$  (\* $p < 0.05$ , significant); *kdrl*  $p = 0.189$  (n.s); *myl7*:  $p = 0.767$  (n.s); *bmp4*:  $p = 0.501$  (n.s). All bar graphs show the mean  $\pm$  SD of 3 independent experiments ( $N = 3$ ). The mean consists of 5 -10 hearts per individual biological group ( $n = 22$  pooled hearts in total). K) and L) show ventral and K') and L') lateral views of *myh6/7* expression (red) and *bmp4* (blue) in control MO (K, K') and *dlc1* MO (L, L') injected embryos. The arrowhead highlights increased staining/expression. K) and L) Scale bar = 100  $\mu\text{m}$ , K') and L') Scale bar = 500  $\mu\text{m}$ . M) shows a schematic cartoon of the changed *bmp4* distribution in *dlc1* mutants hearts compared to WT expression. N) shows the increased numbers of *dlc1* mutants with the severe phenotype after *dlc3* MO injection compared to control MO injected embryos, statistical significance for N) was analyzed using Fisher's exact test. The second experiment proved to be statistically significant (\*\* $p < 0.01$ ) with  $p = 0.0029$ . For N) one clutch of embryos from a single adult mutant pair was divided equally for control MO and *dlc3*-MO injection, respectively.

Figure 6

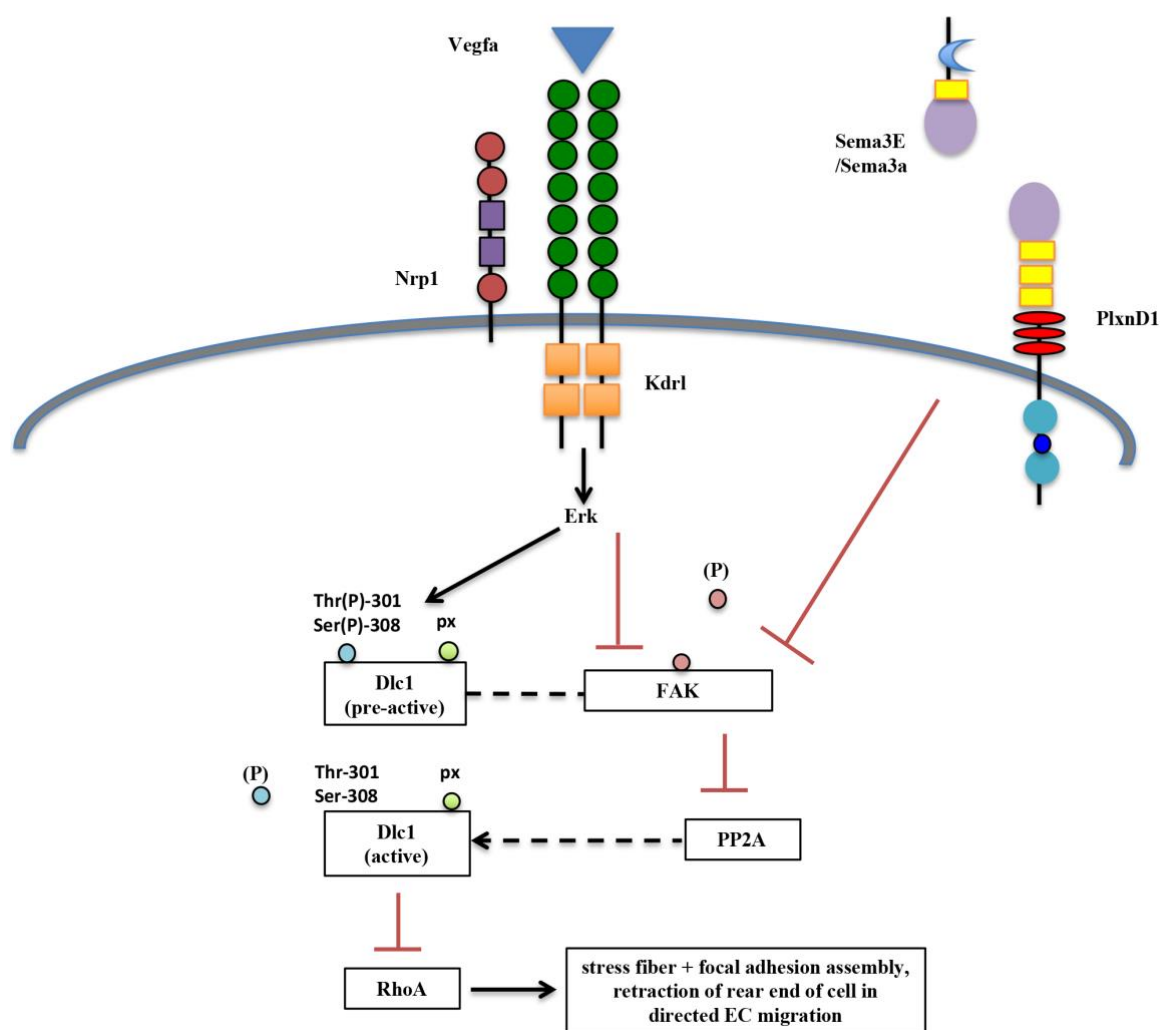

**Fig. 6 Proposed signaling pathway for *dlc1* in ECs during *in vivo* vascular development**

Activation of the VEGF-A/*kdr1*/*Nrp* axis results in ERK activation that is important for inducing a pre-active state of *dlc1*. After inactivation of FAK and subsequent release of the bound pre-activated *dlc1*, PP2A can dephosphorylate *dlc1* on specific residues and fully activate *dlc1*, which in turn deactivates RhoA. Inactivation of RhoA causes stress fiber and focal adhesion disassembly, which controls the retraction of the rear end of endothelial cells during cell migration. *Sema3E/PlxnD1* signaling has been shown to inactivate FAK, providing a link of the VEGF-A/*kdr1*/*Nrp1*/*dlc1* axis and the *Sema3E/PlxnD1*/FAK axis.
